# Supplementary material
Source: publisher figshare collection journal article supplement (https://acs.figshare.com/ndownloader/files/4692010)
Supplement: Supplementary file 1 [file 4692010]

## Supporting information

### Comparison of size of stage NF45 and NF52 tadpoles

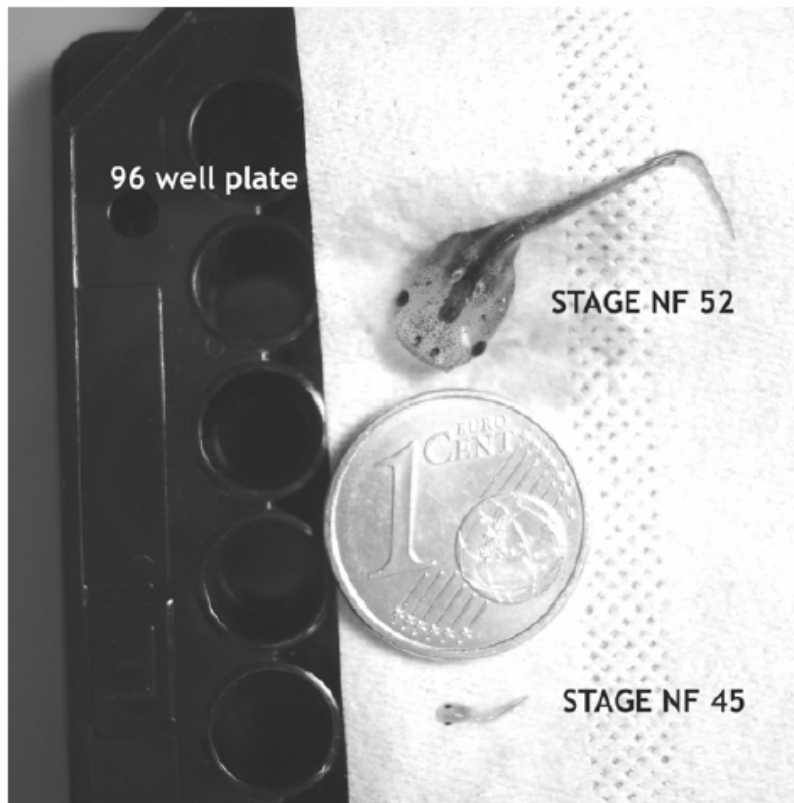

The small size of stage NF45 *Xenopus laevis* tadpoles (overall length, 8mm) allows them to be placed individually in wells of 96 well plate, suitable for robotized reading.
